# Supplementary material
Source: publisher figshare collection journal article supplement (https://wiley.figshare.com/articles/dataset/_/3532139)
Supplement: Supplementary file 1 [file 1 › appendix-A.htm]

Ecological Archives E090-217-A1


### *Ecological Archives* E090-217-A1

### **Guochun Shen, Mingjian Yu, Xin-Sheng Hu, Xiangcheng Mi, Haibao Ren, I-Fang Sun, and Keping Ma. 2009. Species–area relationships explained by the joint effects of dispersal limitation and habitat heterogeneity. *Ecology* 90:3033–3041.**

Appendix A. Main algorithms for the four spatial point models and the steps for estimating parameters used in addressing the joint effects of habitat heterogeneity and dispersal limitation on the species–area relationships (SARs), and calculations of AIC are also detailed. Click here for a PDF file of the appendix.

---


[Back to E090-217]
